# Supplementary material for: Diagnostic accuracy of DNA methylation in detection of gastric cancer: a meta-analysis
Source: PubMed Central journal article supplement (PMC5762578; doi:10.18632/oncotarget.22613), 2017-11-03
Supplement: oncotarget-08-113142-s001.pdf [file oncotarget-08-113142-s001.pdf]

## Diagnostic accuracy of DNA methylation in detection of gastric cancer: a meta-analysis

### SUPPLEMENTARY MATERIALS

**Supplementary Table 1: QUADAS-2: Risk of bias and applicability judgments**

| DOMAIN                                             | PATIENT SELECTION                                                                                                                        | INDEX TEST                                                                                              | REFERENCE STANDARD                                                                                                    | FLOW AND TIMING                                                                                                                                                                                                                                       |
|----------------------------------------------------|------------------------------------------------------------------------------------------------------------------------------------------|---------------------------------------------------------------------------------------------------------|-----------------------------------------------------------------------------------------------------------------------|-------------------------------------------------------------------------------------------------------------------------------------------------------------------------------------------------------------------------------------------------------|
| Description                                        | Describe methods of patient selection: Describe included patients (prior testing, presentation, intended use of index test and setting): | Describe the index test and how it was conducted and interpreted:                                       | Describe the reference standard and how it was conducted and interpreted:                                             | Describe any patients who did not receive the index test(s) and/or reference standard or who were excluded from the 2x2 table (refer to flow diagram): Describe the time interval and any interventions between index test(s) and reference standard: |
| Signalling questions(yes/no/unclear)               | Was a consecutive or random sample of patients enrolled?                                                                                 | Were the index test results interpreted without knowledge of the results of the reference standard?     | Is the reference standard likely to correctly classify the target condition?                                          | Was there an appropriate interval between index test(s) and reference standard?                                                                                                                                                                       |
|                                                    | Was a case-control design avoided?<br>Did the study avoid inappropriate exclusions?                                                      | If a threshold was used, was it pre-specified?                                                          | Were the reference standard results interpreted without knowledge of the results of the index test?                   | Did all patients receive a reference standard?<br>Did all patients receive the same reference standard?<br>Were all patients included in the analysis?                                                                                                |
| Risk of bias: High/low/unclear                     | Could the selection of patients have introduced bias?                                                                                    | Could the conduct or interpretation of the index test have introduced bias?                             | Could the reference standard, its conduct, or its interpretation have introduced bias?                                | Could the patient flow have introduced bias?                                                                                                                                                                                                          |
| Concerns regarding applicability: High/low/unclear | Are there concerns that the included patients do not match the review question?                                                          | Are there concerns that the index test, its conduct, or interpretation differ from the review question? | Are there concerns that the target condition as defined by the reference standard does not match the review question? |                                                                                                                                                                                                                                                       |
